# Supplementary material for: Characteristics of healthcare organisations struggling to improve quality: results from a systematic review of qualitative studies
Source: PubMed Central journal article supplement — BMJ Qual Saf. 2018 Jul 25;28(1):74–84. doi: 10.1136/bmjqs-2017-007573 (PMC6373545; doi:10.1136/bmjqs-2017-007573), 2018-07-25
Supplement: bmjqs-2017-007573supp001.pdf [file bmjqs-2017-007573supp001.pdf]

## **Appendix Tables and Figures**

### **Search Strategy**

**Supplementary Table 1.** Final Codebook and Corresponding Consolidated Framework for Implementation Research Code

**Supplementary Table 2.** Study Characteristics

**Supplementary Table 3.** Risk of Bias of Included Studies using the Critical Appraisal Skills Programme Tool

**Search Strategy**

**OVID Medline 11/1/2016**

|    |                                                                                                                |         |
|----|----------------------------------------------------------------------------------------------------------------|---------|
| 1  | health care surveys/ or interviews as topic/ or focus groups/ or questionnaires/ or self report/               | 439720  |
| 2  | case stud*.mp.                                                                                                 | 76421   |
| 3  | field notes.mp.                                                                                                | 1376    |
| 4  | (perception* or belief*).tw.                                                                                   | 234351  |
| 5  | (health surve* or interview* or focus group*).tw.                                                              | 306701  |
| 6  | qualitative research/                                                                                          | 28859   |
| 7  | (qualitative study* or ethnograph*).tw.                                                                        | 29417   |
| 8  | 1 or 2 or 3 or 4 or 5 or 6 or 7                                                                                | 894188  |
| 9  | ((High adj2 perform*) or (Low adj2 perform*) or (top adj2 perform*) or (bottom adj2 perform*) or laggard*).mp. | 122470  |
| 10 | (hospital* or organization* or organisation* or clinic*).mp.                                                   | 5031621 |
| 11 | 9 and 10                                                                                                       | 17150   |
| 12 | 8 and 11                                                                                                       | 721     |

**Embase 11/1/2016**

|   |                                                                                                                                                 |           |
|---|-------------------------------------------------------------------------------------------------------------------------------------------------|-----------|
| 1 | 'health care survey'/exp OR 'interview'/exp OR 'questionnaire'/exp OR 'self report'/exp OR 'qualitative research'/exp OR 'ethnography'/exp      | 755,666   |
| 2 | 'case stud*':ti,ab OR 'field notes':ti,ab OR percept*':ti,ab OR belief*':ti,ab OR 'focus group*':ti,ab OR qualitative:ti,ab                     | 602,846   |
| 3 | (high NEAR/2 perform*):ti,ab OR (low NEAR/2 perform*):ti,ab OR (top NEAR/2 perform*):ti,ab OR (bottom NEAR/2 perform*):ti,ab OR laggard*':ti,ab | 143,986   |
| 4 | perform* NEAR/3 (hospital* OR organization* OR organisation* OR clinic*)                                                                        | 70,570    |
| 5 | #1 OR #2                                                                                                                                        | 1,229,104 |
| 6 | #3 AND #4                                                                                                                                       | 1,204     |
| 7 | #5 AND #6                                                                                                                                       | 77        |

**Scopus 11/4/2016 (682 documents)**

(( TITLE-ABS-KEY ( "health care survey" OR "interview\*" OR "questionnaire\*" OR "self report\*" OR "qualitative" OR "ethnograph\*" )) OR ( TITLE-ABS-KEY ( "case stud\*" OR "field notes" OR percept\* OR belief\* OR "focus group\*" ))) AND (( TITLE-ABS-KEY ( ( high W/2 perform\* ) OR ( low W/2 perform\* ) OR ( top W/2 perform\* ) OR ( bottom W/2 perform\* ) )) AND ( TITLE-ABS-KEY ( perform\* W/3 ( hospital\* OR health\* OR medic\* OR clinic\* ) )))

**Web of Science 11/4/2016**

|   |                                                                                                                                                                                              |           |
|---|----------------------------------------------------------------------------------------------------------------------------------------------------------------------------------------------|-----------|
| 1 | TS=("health care survey" OR "interview*" OR "questionnaire*" OR "self report*" OR "qualitative" OR "ethnograph*" OR "case stud*" OR "field notes" OR percept* OR belief* OR "focus group*" ) | 1,858,089 |
| 2 | TS=((high NEAR/2 perform* ) OR (low NEAR/2 perform* ) OR ( top NEAR/2 perform* ) OR ( bottom NEAR/2 perform* ) )                                                                             | 371,714   |
| 3 | TS=(perform* NEAR/3 ( hospital* OR health* OR medic* OR clinic* ) )                                                                                                                          | 83,655    |
| 4 | #3 AND #2                                                                                                                                                                                    | 2,738     |
| 5 | #4 AND #1                                                                                                                                                                                    | 406       |

UPDATE(2016-5/22/2017) – 80 unique citations

Ovid Medline: 63; after deduplication: 22

Embase: 12; after deduplication: 9

Scopus: 100; after deduplication: 38

WoS: 76; after deduplication: 11

UPDATE2(2017-2/8/2018) – 157 unique citations

Ovid Medline: 86; after deduplication: 78

Embase: 26; after deduplication: 14

Scopus: 89; after deduplication: 51

WoS: 64; after deduplication: 14

**Supplementary Table 1.** Final Codebook and Corresponding Consolidated Framework for Implementation Research Code

| Domain Theme/Code <sup>a</sup> Code | Pertinent Definition, Inclusions, Exclusions, and Notes                                                                          | Corresponding Consolidated Framework for Implementation Research <sup>1</sup> Code (Definition)                                                                                                                                                                                                                                                                                         |
|-------------------------------------|----------------------------------------------------------------------------------------------------------------------------------|-----------------------------------------------------------------------------------------------------------------------------------------------------------------------------------------------------------------------------------------------------------------------------------------------------------------------------------------------------------------------------------------|
| Poor Organizational Culture         |                                                                                                                                  | Culture (Norms, values, and basic assumptions of a given organization.)                                                                                                                                                                                                                                                                                                                 |
| Hierarchical                        |                                                                                                                                  | Hierarchical Culture (Clear lines of authority over organizational processes, respect for formal hierarchy, adherence to rules, stability and predictability.)                                                                                                                                                                                                                          |
| Negative approach to problems       | When leadership’s approach to problems dis-incentivizes employees from speaking up (include punitive, ineffective)               | (Opposite of) Organizational Incentives and Rewards (Extrinsic incentives such as goal-sharing, awards, performance reviews, promotions, and raises in salary, and less tangible incentives such as increased stature or respect.)                                                                                                                                                      |
| Unvalued nurses                     | Underutilized or undervalued                                                                                                     |                                                                                                                                                                                                                                                                                                                                                                                         |
| Limited staff roles                 | Exclude nurses                                                                                                                   |                                                                                                                                                                                                                                                                                                                                                                                         |
| Un-empowered middle management      |                                                                                                                                  |                                                                                                                                                                                                                                                                                                                                                                                         |
| Autocratic                          |                                                                                                                                  |                                                                                                                                                                                                                                                                                                                                                                                         |
| “Culture of Fear”                   | Any use of fear to describe the collective feeling of employees.                                                                 |                                                                                                                                                                                                                                                                                                                                                                                         |
| Not Collaborative                   |                                                                                                                                  | (Opposite of) Team Culture (Cohesion, morale, human resource development, mutual support)                                                                                                                                                                                                                                                                                               |
| Not Multidisciplinary               | Between different types of employees (e.g., nurses and physicians) or use of the word “disciplines.”                             |                                                                                                                                                                                                                                                                                                                                                                                         |
| Not Interdepartmental               | Between different departments (e.g., medicine and surgery) or use of the word “interdepartmental.” Include references to siloes. |                                                                                                                                                                                                                                                                                                                                                                                         |
| Lacking Group Connectivity          | Lacking team culture, include “like a family”                                                                                    | Part of Team Culture                                                                                                                                                                                                                                                                                                                                                                    |
| Lacking a Learning Climate          | Opposite of learning climate.                                                                                                    | Learning climate (A climate in which: 1. Leaders express their own fallibility and need for team members’ assistance and input; 2. Team members feel that they are essential, valued, and knowledgeable partners in the change process; 3. Individuals feel psychologically safe to try new methods; and 4. There is sufficient time and space for reflective thinking and evaluation.) |

| <b>Domain Theme/Code<sup>a</sup> Code</b> | <b>Pertinent Definition, Inclusions, Exclusions, and Notes</b>                                                                       | <b>Corresponding Consolidated Framework for Implementation Research<sup>1</sup> Code (Definition)</b>                                                                                                                          |
|-------------------------------------------|--------------------------------------------------------------------------------------------------------------------------------------|--------------------------------------------------------------------------------------------------------------------------------------------------------------------------------------------------------------------------------|
| Communication (structured)                | Formal communication processes or use of policies.                                                                                   | Networks & Communications (The nature and quality of webs of social networks, and the nature and quality of formal and informal communications within an organization.)                                                        |
| Communication (unstructured)              | Informal communication processes.                                                                                                    |                                                                                                                                                                                                                                |
| Low Morale                                | Include any description of generally poor morale by interviewees.                                                                    | Part of Team Culture                                                                                                                                                                                                           |
| Limited Ownership and Involvement         |                                                                                                                                      | Engaging (Attracting and involving appropriate individuals in the implementation and use of the innovation through a combined strategy of social marketing, education, role modeling, training, and other similar activities.) |
| General                                   | Culture that supports involvement/ownership in QI/patient safety                                                                     | Readiness for Implementation (Tangible and immediate indicators of organizational commitment to its decision to implement an innovation.)                                                                                      |
| Lack of accountability                    | Lack of external or internal accountability, include feedback.                                                                       | Goals and Feedback (The degree to which goals are clearly communicated, acted upon, and fed back to staff, and alignment of that feedback with goals.)                                                                         |
| Lack of involvement                       | In QI/patient safety                                                                                                                 |                                                                                                                                                                                                                                |
| Lack of champions                         | Include mention of “constipators” (employees who actively or passively resist improvement)                                           | Champions (“Individuals who dedicate themselves to supporting, marketing, and ‘driving through’ an [implementation]”, overcoming indifference or resistance that the innovation may provoke in an organization.)               |
| Poor self-efficacy                        | Include when interviewees mention they do not believe they can make a change                                                         | Self-efficacy (Individual belief in their own capabilities to execute courses of action to achieve implementation goals.)                                                                                                      |
| Un-empowered frontline staff              | Include when interviewees mention that they lack the external tools/supports to make a change                                        |                                                                                                                                                                                                                                |
| Lack of ownership                         | (General) for the institution’s problems                                                                                             |                                                                                                                                                                                                                                |
| Blaming patients                          | When patient factors (mental illness, poverty, cultural barriers, etc.) are mentioned as the cause for poor performance by employees |                                                                                                                                                                                                                                |

| Domain<br>Theme/Code <sup>a</sup><br>Code                                                           | Pertinent Definition, Inclusions,<br>Exclusions, and Notes                                                                                                 | Corresponding Consolidated Framework for<br>Implementation Research <sup>1</sup> Code (Definition)                                                                                                                                                                                                                                                                                                                  |
|-----------------------------------------------------------------------------------------------------|------------------------------------------------------------------------------------------------------------------------------------------------------------|---------------------------------------------------------------------------------------------------------------------------------------------------------------------------------------------------------------------------------------------------------------------------------------------------------------------------------------------------------------------------------------------------------------------|
| Disconnected<br>Leadership                                                                          |                                                                                                                                                            | Leadership Engagement (Commitment, involvement, and accountability of leaders and managers with the implementation of the innovation.)                                                                                                                                                                                                                                                                              |
| Disconnected                                                                                        | Include poorly accessible leaders                                                                                                                          |                                                                                                                                                                                                                                                                                                                                                                                                                     |
| Non-transparent                                                                                     | Any discussion of poor transparency                                                                                                                        |                                                                                                                                                                                                                                                                                                                                                                                                                     |
| Unsupportive                                                                                        |                                                                                                                                                            |                                                                                                                                                                                                                                                                                                                                                                                                                     |
| Lack of Leader<br>Development                                                                       | When discussing leadership training                                                                                                                        |                                                                                                                                                                                                                                                                                                                                                                                                                     |
| Inadequate Infrastructure                                                                           |                                                                                                                                                            | Needs & Resources of Those Served by the Organization (The extent to which the needs of those served by the organization (e.g., patients), as well as barriers and facilitators to meet those needs, are accurately known and prioritized by the organization.)                                                                                                                                                     |
| Inadequate Quality<br>Improvement<br>Infrastructure                                                 | Include any mention of quality improvement teams, systems, processes, mechanisms, training, education, or guidelines (include “reflecting and evaluating”) | Includes Reflecting and Evaluating (Quantitative and qualitative feedback about the progress and quality of implementation accompanied with regular personal and team debriefing about progress and experience.)                                                                                                                                                                                                    |
| Poor Information<br>Technology Services                                                             | Include any technology limitations (e.g. electronic medical records, automated feedback, lack of data, etc.)                                               |                                                                                                                                                                                                                                                                                                                                                                                                                     |
| Insufficient Staffing and<br>High Turnover                                                          | Include difficulties with recruitment and retention or staff role/training mismatch                                                                        |                                                                                                                                                                                                                                                                                                                                                                                                                     |
| Lack of Resources                                                                                   | When a general lack of resources (financial or dedicated time) is noted                                                                                    | Available Resources (The level of resources organizational dedicated for implementation and on-going operations including physical space and time.)                                                                                                                                                                                                                                                                 |
| Lack of Cohesive Mission and Vision-includes reference to implicit or explicit organizational goals |                                                                                                                                                            |                                                                                                                                                                                                                                                                                                                                                                                                                     |
| Externally Motivated                                                                                | External goals (e.g., quality targets, financial penalties, public relations) cited as organizational motivation                                           | <b>External Policy &amp; Incentives</b> (A broad construct that includes external strategies to spread innovations including policy and regulations (governmental or other central entity), external mandates, recommendations and guidelines, pay-for-performance, collaboratives, and public or benchmark reporting.)<br>and<br><b>Peer pressure</b> (Mimetic or competitive pressure to implement an innovation, |

| Domain Theme/Code <sup>a</sup><br>Code                                                        | Pertinent Definition, Inclusions, Exclusions, and Notes                   | Corresponding Consolidated Framework for Implementation Research <sup>1</sup> Code (Definition)                                                                             |
|-----------------------------------------------------------------------------------------------|---------------------------------------------------------------------------|-----------------------------------------------------------------------------------------------------------------------------------------------------------------------------|
|                                                                                               |                                                                           | typically because most or other key peer or competing organizations have already implemented or are in a bid for a competitive edge)                                        |
| Vision of Mediocrity                                                                          | Generally low expectations (lacking a vision of excellence)               |                                                                                                                                                                             |
| Conflicting Missions                                                                          | When implicit and explicit goals differ or there are competing priorities |                                                                                                                                                                             |
| Poorly Defined                                                                                | Poorly set or poorly communicated organizational goals or expectations    |                                                                                                                                                                             |
| System Shocks (An organization-wide event or change that detracts from day to day operations) |                                                                           | N/A                                                                                                                                                                         |
| Senior Leadership Turnover                                                                    | When management turnover is noted as a reason for difficulty              |                                                                                                                                                                             |
| Financial Failure or Severe Difficulties                                                      | New or worsening organization-wide financial difficulties                 |                                                                                                                                                                             |
| Mergers (or Reorganization)                                                                   | Include any organizational restructuring                                  |                                                                                                                                                                             |
| New Electronic Health Record                                                                  | Adoption (or changing) of an electronic health record system              |                                                                                                                                                                             |
| Major Scandals                                                                                | Any mention of public relations difficulties                              |                                                                                                                                                                             |
| External relationships                                                                        |                                                                           | Cosmopolitanism (the degree to which an organization is networked with other external organizations)                                                                        |
| Other hospitals                                                                               | Include referral centers                                                  | Includes External Change Agents (Individuals who are affiliated with an outside entity who formally influence or facilitate innovation decisions in a desirable direction.) |
| Stakeholders                                                                                  | Includes patients/public                                                  | Includes Innovation Participants (Individuals served by the organization that participate in the innovation, e.g., patients in a prevention program in a hospital.)         |
| Governing body                                                                                |                                                                           |                                                                                                                                                                             |

<sup>a</sup>Many codes (e.g., mergers, lack of resources) remained as stand-alone themes.

**Supplementary Table 2. Study Characteristics**

| Source                           | Country | Journal                                       | Condition for Low-Performing                                                                                                                               | Cut-off for Low-Performing | Primary Sampling Unit         | Secondary Sampling Unit <sup>a</sup>                                                                                                                                                                                  | Study Quality <sup>b</sup> |
|----------------------------------|---------|-----------------------------------------------|------------------------------------------------------------------------------------------------------------------------------------------------------------|----------------------------|-------------------------------|-----------------------------------------------------------------------------------------------------------------------------------------------------------------------------------------------------------------------|----------------------------|
| Overall Performance              |         |                                               |                                                                                                                                                            |                            |                               |                                                                                                                                                                                                                       |                            |
| D'Aunno et al, 2016 <sup>2</sup> | USA     | Health Services Research                      | Avoidable costs (avoidable inpatient admissions, 30 day readmission, ED visits) and quality of care (3 diabetes measures, 2 CHF measures, 3 COPD measures) | Bottom 50% (then picked 3) | 3 primary care ACOs           | 60 "key individuals": board chair, CEO, CFO, manager responsible for ACO operations; also 14 interviews with informants from insurance plan who oversaw the implementation of work that spanned all ACOs              | 6/10                       |
| Mabuchi et al, 2017 <sup>3</sup> | Nigeria | Health Policy and Planning                    | Levels of performance-based financial incentive earning                                                                                                    | Not reported               | 4 primary care health centers | Health center leaders, health workers, chairperson of Ward Development Committee, Local Government Area primary health care center department supervisor, and performance based financing consultant (# not reported) | 8/10                       |
| Mannion et al, 2005 <sup>4</sup> | UK      | Journal of Health Organization and Management | United Kingdom Department of Health's star performance rating                                                                                              | 0 or 1 star (out of 3)     | 4 hospitals                   | 8-11 key managers and senior clinicians per hospital                                                                                                                                                                  | 6/10                       |



| Source                            | Country  | Journal                      | Condition for Low-Performing                                                                                        | Cut-off for Low-Performing                                                                              | Primary Sampling Unit                            | Secondary Sampling Unit <sup>a</sup>                                                                                                                                     | Study Quality <sup>b</sup> |
|-----------------------------------|----------|------------------------------|---------------------------------------------------------------------------------------------------------------------|---------------------------------------------------------------------------------------------------------|--------------------------------------------------|--------------------------------------------------------------------------------------------------------------------------------------------------------------------------|----------------------------|
| Ravaghi et al, 2015 <sup>5</sup>  | UK       | The Health Care Manager      | United Kingdom Department of Health's star performance rating                                                       | 0 star (out of 3)                                                                                       | 1 hospital                                       | 57 "key informants"                                                                                                                                                      | 7/10                       |
| Composite Metric                  |          |                              |                                                                                                                     |                                                                                                         |                                                  |                                                                                                                                                                          |                            |
| Brewster et al, 2016 <sup>6</sup> | USA      | Medical Care                 | Risk-standardized readmission rates                                                                                 | >1% point increase in readmissions over 2 years                                                         | 3 hospitals                                      | 82 "key staff", including physicians, nurses, and staff                                                                                                                  | 8/10                       |
| Chang et al, 2017 <sup>7</sup>    | USA      | Annals of Emergency Medicine | CMS's case-mix-adjusted ED LOS and boarding times for admitting patients                                            | Bottom 5%                                                                                               | 4 hospitals                                      | 60 "key hospital informants": administrative leadership and members of flow task forces (hospital executives, ED chairs and directors, nurse managers, and hospitalists) | 9/10                       |
| Engle et al, 2017 <sup>8</sup>    | USA      | Psychological Services       | Composite quality measure and resident centered care score                                                          | "Low" on both quality and resident centered care; also added a site based on "site visitor impressions" | 5 VA Community Living Centers (VA nursing homes) | 108 executive leaders, middle managers, and frontline staff                                                                                                              | 8/10                       |
| Fetene et al, 2016 <sup>9</sup>   | Ethiopia | PLOS One                     | 5 quality indicators obtained from Health Management Information System primary health system-based planning report | Bottom 5%                                                                                               | 3 primary health systems                         | 94 clinical and administrative staff                                                                                                                                     | 7/10                       |

| Source                                    | Country | Journal                                                    | Condition for Low-Performing                                                                                            | Cut-off for Low-Performing                                                                               | Primary Sampling Unit            | Secondary Sampling Unit <sup>a</sup>                                                                                      | Study Quality <sup>b</sup> |
|-------------------------------------------|---------|------------------------------------------------------------|-------------------------------------------------------------------------------------------------------------------------|----------------------------------------------------------------------------------------------------------|----------------------------------|---------------------------------------------------------------------------------------------------------------------------|----------------------------|
| Forbes-Thompson et al, 2007 <sup>10</sup> | USA     | Health Care Management Review                              | Deficiencies on most recent survey inspection                                                                           | ≥10 deficiencies (≥1 at “harm” level and ≥1 in “quality of care”)                                        | 2 nursing homes                  | 74 administrative, direct care, and ancillary staff                                                                       | 9/10                       |
| Hockey and Bates, 2010 <sup>11</sup>      | USA     | The Joint Commission Journal on Quality and Patient Safety | Hospital Quality Alliance Data (CHF, pneumonia)                                                                         | Bottom 10% for 2 years                                                                                   | 2 hospitals                      | 17 frontline physicians                                                                                                   | 8/10                       |
| Hogg et al, 2002 <sup>12</sup>            | Canada  | Journal of Health Services Research & Policy               | Preventative care performance                                                                                           | Low increase in performance                                                                              | 4 family practices               | Physicians, nurses, and/or office staff (# not reported)                                                                  | 6/10                       |
| Hysong et al, 2007 <sup>13</sup>          | USA     | Health Services Research                                   | Guideline adherence scores for 6 VA Clinical Practice Guidelines                                                        | Sustained low adherence to Clinical Practice Guidelines and in bottom 3 of External Peer Review Rankings | 3 VA primary care clinics        | 102 clinical and managerial personnel including leadership, middle management, and primary care providers                 | 5/10                       |
| Miller-Day et al, 2017 <sup>14</sup>      | USA     | Journal of Health Organization and Management              | Diabetes performance measures and National Committee for Quality Assurance standards for Patient-Centered Medical Homes | Bottom 2 in combined metric (diabetes and Patient-Centered Medical Home standards)                       | 2 primary care medical practices | 33 interviews of 37 “diverse leaders and personnel” including physicians, nurse practitioners, office managers, and staff | 6/10                       |

| Source                                    | Country     | Journal                                     | Condition for Low-Performing                                                                                                                  | Cut-off for Low-Performing                                              | Primary Sampling Unit                                  | Secondary Sampling Unit <sup>a</sup>                                                                                                                    | Study Quality <sup>b</sup> |
|-------------------------------------------|-------------|---------------------------------------------|-----------------------------------------------------------------------------------------------------------------------------------------------|-------------------------------------------------------------------------|--------------------------------------------------------|---------------------------------------------------------------------------------------------------------------------------------------------------------|----------------------------|
| Scott-Cawiezell et al, 2005 <sup>15</sup> | USA         | Health Care Management Review               | Performance on 3 Quality Indicators from the Minimum Data Set database for selection; then used composite measures to identify low-performers | Lower quintile by working condition and performance cluster             | 7 nursing homes                                        | 4 per site (112-128 total) key staff (Certified Nursing Assistants, Registered Nurses, Licensed Practical Nurses, administrators, directors of nursing) | 5/10                       |
| Shin et al, 2014 <sup>16</sup>            | USA         | Medical Care Research and Review            | AHRQ's Patient Safety Indicators (PSI-90) composite score                                                                                     | Bottom 5 composite PSI 90 (then picked 3)                               | 3 VA hospitals                                         | 138 patient safety staff and senior leaders                                                                                                             | 9/10                       |
| Young et al, 1997 <sup>17</sup>           | USA         | Health Care Management Review               | Risk adjusted 30-day mortality and morbidity (post op complications) rates for a major surgical procedure                                     | One of the 5 highest observed to expected mortality or morbidity ratios | 10 VA surgical services                                | Physician and nursing leadership, QI staff, surgeons, anesthesiologists, nurses, and clinical support staff (# not reported)                            | 6/10                       |
| Disease-Specific Metric                   |             |                                             |                                                                                                                                               |                                                                         |                                                        |                                                                                                                                                         |                            |
| Bickell et al, 2016 <sup>18</sup>         | USA         | Health Services Research                    | Underuse of breast cancer care                                                                                                                | Greater than 15% underuse                                               | 4 hospitals                                            | 90 oncologists, leaders, and clinical staff                                                                                                             | 6/10                       |
| Caris et al, 2017 <sup>19</sup>           | Netherlands | Infection Control and Hospital Epidemiology | No improvement in hand hygiene rates                                                                                                          | 2 least improved (no improvement)                                       | 2 units in an acute care hospital                      | 24 unit managers, physicians, and nurses                                                                                                                | 8/10                       |
| Chuang et al, 2017 <sup>20</sup>          | USA         | Vaccine                                     | HPV vaccine initiation and completion rates                                                                                                   | Not reported                                                            | 2 outpatient family medicine/pediatric clinics in FQHC | 36 clinic care team members and key stakeholders in senior leadership within the FQHC                                                                   | 7/10                       |

| Source                                                                | Country | Journal                                                   | Condition for Low-Performing                                                                                                          | Cut-off for Low-Performing                                 | Primary Sampling Unit                                                                       | Secondary Sampling Unit <sup>a</sup>                                                                                      | Study Quality <sup>b</sup> |
|-----------------------------------------------------------------------|---------|-----------------------------------------------------------|---------------------------------------------------------------------------------------------------------------------------------------|------------------------------------------------------------|---------------------------------------------------------------------------------------------|---------------------------------------------------------------------------------------------------------------------------|----------------------------|
| Curry et al, 2011 <sup>21</sup> and Landman et al, 2013 <sup>22</sup> | USA     | Annals of Internal Medicine; Annals of Emergency Medicine | 30-day risk standardized mortality rates for patients hospitalized with acute myocardial infarction                                   | Bottom 5% in risk-standardized mortality rates for 2 years | 4 hospitals                                                                                 | 158 physicians, nurses, administrative, and clinical staff                                                                | 6/10                       |
| Ellerbe et al, 2017 <sup>23</sup>                                     | USA     | Addiction Science & Clinical Practice                     | Pre-admission Substance Use Disorder treatment metrics (wait time, engagement while waiting)                                          | Not reported                                               | 14 VA substance use disorder or mental health residential rehabilitation treatment programs | 63 staff with social work degree or PhD, physicians or nurses (all providers) or program managers                         | 7/10                       |
| Gabbay et al, 2013 <sup>24</sup>                                      | USA     | Annals of Family Medicine                                 | Improvement in 3 registry-based performance measures related to diabetes care                                                         | 5 least improved (lowest quintile)                         | 5 adult primary care practices                                                              | 55 clinicians, managers, and staff                                                                                        | 6/10                       |
| Gagliardi and Nathens, 2015 <sup>25</sup>                             | Canada  | Journal of Trauma Acute Care Surgery                      | ED length of stay (prior to transfer to designated trauma center)                                                                     | Longer than median ED length of stay (11 highest of 22)    | 9 EDs                                                                                       | 27 ED physicians and nurses                                                                                               | 6/10                       |
| Hafner et al, 2008 <sup>26</sup>                                      | USA     | Journal of Clinical Outcomes Management                   | Provision of smoking cessation counselling in adult patients in acute myocardial infarction, heart failure, and pneumonia populations | 10 hospitals with least improvement (-19% to 10%)          | 7 hospitals                                                                                 | 1-11 per site (mean 6);14 group interviews with physicians, clinical staff, and QI individuals                            | 9/10                       |
| Kirsh et al, 2012 <sup>27</sup>                                       | USA     | American Journal of Medical Quality                       | % of patients with A1C >9%                                                                                                            | “Stratified into high, mid and low”                        | 3 VA community based outpatient clinics                                                     | More than 29 including site visits; primary clinic directors and/or primary care leaders, physicians, nurses, pharmacists | 2/10                       |

| Source                                                                                                                          | Country | Journal                                                                                                  | Condition for Low-Performing                                                                           | Cut-off for Low-Performing                                                                                    | Primary Sampling Unit     | Secondary Sampling Unit <sup>a</sup>                                                                            | Study Quality <sup>b</sup> |
|---------------------------------------------------------------------------------------------------------------------------------|---------|----------------------------------------------------------------------------------------------------------|--------------------------------------------------------------------------------------------------------|---------------------------------------------------------------------------------------------------------------|---------------------------|-----------------------------------------------------------------------------------------------------------------|----------------------------|
| McAlearney et al, 2015; <sup>28</sup><br>McAlearney et al, 2016; <sup>29</sup> and<br>McAlearney and Hefner, 2016 <sup>30</sup> | USA     | Infection Control and Hospital Epidemiology; Health Care Manage Review; Medical Care Research and Review | CLABSI rates                                                                                           | CLABSI rates increased, stayed the same, were inconsistent, or failed to reach zero despite intervention      | 3 hospitals               | 194 administrative and clinical leaders, staff, and frontline clinicians and nurses                             | 9/10                       |
| Newby et al, 2016 <sup>31</sup>                                                                                                 | UK      | Family Practice                                                                                          | Vaccination rates                                                                                      | Uptake below 75% in two or more at-risk groups                                                                | 10 family practices       | 20 senior members of staff (18 practice managers and 2 general practitioners)                                   | 8/10                       |
| Ralston et al, 2017 <sup>32</sup>                                                                                               | USA     | Academic Pediatrics                                                                                      | Use of bronchodilators and steroids during bronchiolitis quality improvement collaborative             | End of project performance and magnitude of change, stratified by quartile, oversampling top and bottom (80%) | 4 children's hospitals    | Team members from the collaborative: mostly physicians, also nurses and respiratory therapists (# not reported) | 8/10                       |
| Rose et al, 2012 <sup>33</sup>                                                                                                  | USA     | Health Services Research                                                                                 | Anticoagulation Control; defined by time in therapeutic range for warfarin                             | Selected 3 of bottom 10 (out of 100)                                                                          | 3 anticoagulation clinics | 55 staff, physicians and pharmacists                                                                            | 9/10                       |
| Wakeam et al, 2014 <sup>34</sup>                                                                                                | USA     | The Joint Commission Journal on Quality and Patient Safety                                               | Hospital Compares' PSI 04 (Death rates among surgical inpatients with serious treatable complications) | Rates worse than national average                                                                             | 3 hospitals               | 106 chiefs, surgeons, nurses, rapid response team members, and quality officers                                 | 6/10                       |

Abbreviations: ACO, Accountable Care Organization; AHRQ, Agency for Healthcare Research and Quality; CEO, chief executive officer; CFO, chief financial officer; CHF, congestive heart failure; CLABSI, central line-associated bloodstream infection; CMS, Centers for Medicare and Medicaid Services; COPD, chronic obstructive pulmonary disease; ED,

Emergency Department; FQHC, Federally Qualified Health Center; HPV, Human Papillomavirus; LOS, length of stay; PSI; Patient Safety Indicators' PSI-90, Patient Safety and Adverse Events Composite; VA, Veterans Affairs; UK, United Kingdom; USA, United States of America

<sup>a</sup> As studies often did not report separate values, secondary sampling units include also, when applicable, interviewees in mid- or high-performing sites.

<sup>b</sup> Based on Critical Appraisal Skills Programme (CASP) Qualitative Research Checklist. Scores are out of a potential 10 points, with 10 indicating higher quality. The breakdown of individual scores can be found in **Supplementary Table 3**.

**Supplementary Table 3.** Risk of Bias of Included Studies using the Critical Appraisal Skills Programme Tool

| Source                       | Statement of Aims | Appropriate Method | Appropriate Design | Appropriate Recruitment | Appropriate Data Collection | Relationship Between Researcher and Participant Considered | Ethical Issues Considered | Rigorous Data Analysis | Statement of Findings | How Valuable is the Research? | Total |
|------------------------------|-------------------|--------------------|--------------------|-------------------------|-----------------------------|------------------------------------------------------------|---------------------------|------------------------|-----------------------|-------------------------------|-------|
| Overall Performance          |                   |                    |                    |                         |                             |                                                            |                           |                        |                       |                               |       |
| D'Aunno et al., 2016         | Yes               | Yes                | Yes                | Can't Tell              | Yes                         | No                                                         | Yes                       | Can't Tell             | Yes                   | Less Valuable                 | 6/10  |
| Mabuchi et al., 2017         | Yes               | Yes                | Yes                | Can't Tell              | Yes                         | Yes                                                        | No                        | Yes                    | Yes                   | Valuable                      | 8/10  |
| Mannion et al., 2005         | Yes               | Yes                | Yes                | Can't Tell              | Yes                         | No                                                         | No                        | Can't Tell             | Yes                   | Valuable                      | 6/10  |
| Ravaghi et al., 2015         | Yes               | Yes                | Yes                | Can't Tell              | Yes                         | No                                                         | Yes                       | Can't Tell             | Yes                   | Valuable                      | 7/10  |
| Composite Metric             |                   |                    |                    |                         |                             |                                                            |                           |                        |                       |                               |       |
| Brewster et al., 2016        | Yes               | Yes                | Yes                | Yes                     | Yes                         | No                                                         | Yes                       | Can't Tell             | Yes                   | Valuable                      | 8/10  |
| Chang et al., 2017           | Yes               | Yes                | Yes                | Yes                     | Yes                         | No                                                         | Yes                       | Yes                    | Yes                   | Valuable                      | 9/10  |
| Engle et al., 2017           | Yes               | Yes                | Yes                | Can't Tell              | Yes                         | No                                                         | Yes                       | Yes                    | Yes                   | Valuable                      | 8/10  |
| Fetene et al., 2016          | Yes               | Yes                | Yes                | Can't Tell              | Yes                         | No                                                         | Yes                       | Yes                    | Yes                   | Less Valuable                 | 7/10  |
| Forbes-Thompson et al., 2007 | Yes               | Yes                | Yes                | Can't Tell              | Yes                         | Yes                                                        | Yes                       | Yes                    | Yes                   | Valuable                      | 9/10  |
| Hockey and Bates, 2010       | Yes               | Yes                | Yes                | Yes                     | Yes                         | No                                                         | Yes                       | Can't Tell             | Yes                   | Valuable                      | 8/10  |
| Hogg et al., 2002            | Yes               | Yes                | Yes                | Can't Tell              | Yes                         | Yes                                                        | No                        | Can't Tell             | Yes                   | Less Valuable                 | 6/10  |

| Source                                      | Statement of Aims | Appropriate Method | Appropriate Design | Appropriate Recruitment | Appropriate Data Collection | Relationship Between Researcher and Participant Considered | Ethical Issues Considered | Rigorous Data Analysis | Statement of Findings | How Valuable is the Research? | Total |
|---------------------------------------------|-------------------|--------------------|--------------------|-------------------------|-----------------------------|------------------------------------------------------------|---------------------------|------------------------|-----------------------|-------------------------------|-------|
| Hysong et al., 2007                         | Yes               | Can't Tell         | No                 | Yes                     | Yes                         | No                                                         | Yes                       | Can't Tell             | Yes                   | Less Valuable                 | 5/10  |
| Miller-Day et al., 2017                     | Yes               | Yes                | Yes                | Can't Tell              | Yes                         | No                                                         | No                        | Can't Tell             | Yes                   | Valuable                      | 6/10  |
| Scott-Cawiezell et al., 2005                | Yes               | Yes                | Yes                | Can't Tell              | Yes                         | No                                                         | No                        | Can't Tell             | Yes                   | Less Valuable                 | 5/10  |
| Shin et al., 2014                           | Yes               | Yes                | Yes                | Yes                     | Yes                         | No                                                         | Yes                       | Yes                    | Yes                   | Valuable                      | 9/10  |
| Young et al., 1997                          | Yes               | Yes                | Yes                | Can't Tell              | Yes                         | No                                                         | No                        | Can't Tell             | Yes                   | Valuable                      | 6/10  |
| Disease-Specific Metric                     |                   |                    |                    |                         |                             |                                                            |                           |                        |                       |                               |       |
| Bickell et al., 2016                        | Yes               | Yes                | Yes                | Can't Tell              | Yes                         | No                                                         | Yes                       | No                     | Yes                   | Less Valuable                 | 6/10  |
| Caris et al., 2017                          | Yes               | Yes                | Yes                | Yes                     | Yes                         | No                                                         | No                        | Yes                    | Yes                   | Valuable                      | 8/10  |
| Chuang et al., 2017                         | Yes               | Yes                | Yes                | Can't Tell              | Yes                         | No                                                         | Yes                       | No                     | Yes                   | Valuable                      | 7/10  |
| Curry et al., 2011 and Landman et al., 2013 | Yes               | Yes                | Yes                | Can't Tell              | Yes                         | No                                                         | No                        | Can't Tell             | Yes                   | Valuable                      | 6/10  |
| Ellerbe et al., 2017                        | Yes               | Yes                | Yes                | No                      | Yes                         | No                                                         | Yes                       | No                     | Yes                   | Valuable                      | 7/10  |
| Gabbay et al., 2013                         | Yes               | Yes                | Yes                | Can't Tell              | Yes                         | No                                                         | No                        | Can't Tell             | Yes                   | Valuable                      | 6/10  |
| Gagliardi and Nathens, 2015                 | Yes               | Yes                | Yes                | Can't Tell              | Yes                         | No                                                         | Yes                       | Can't Tell             | Yes                   | Not Valuable                  | 6/10  |



| Source                                                                            | Statement of Aims | Appropriate Method | Appropriate Design | Appropriate Recruitment | Appropriate Data Collection | Relationship Between Researcher and Participant Considered | Ethical Issues Considered | Rigorous Data Analysis | Statement of Findings | How Valuable is the Research? | Total |
|-----------------------------------------------------------------------------------|-------------------|--------------------|--------------------|-------------------------|-----------------------------|------------------------------------------------------------|---------------------------|------------------------|-----------------------|-------------------------------|-------|
| Hafner et al., 2008                                                               | Yes               | Yes                | Yes                | Yes                     | Yes                         | Yes                                                        | Yes                       | Yes                    | Yes                   | Less Valuable                 | 9/10  |
| Kirsch et al., 2012                                                               | Yes               | No                 | Yes                | Can't Tell              | No                          | No                                                         | No                        | No                     | No                    | Not Valuable                  | 2/10  |
| McAlearney et al., 2015; McAlearney et al., 2016; and McAlearney and Hefner, 2016 | Yes               | Yes                | Yes                | Yes                     | Yes                         | No                                                         | Yes                       | Yes                    | Yes                   | Valuable                      | 9/10  |
| Newby et al., 2016                                                                | Yes               | Yes                | Yes                | Yes                     | Yes                         | No                                                         | Yes                       | Can't Tell             | Yes                   | Valuable                      | 8/10  |
| Ralston et al., 2017                                                              | Yes               | Yes                | Yes                | Can't Tell              | Yes                         | Yes                                                        | Yes                       | Can't Tell             | Yes                   | Valuable                      | 8/10  |
| Rose et al., 2012                                                                 | Yes               | Yes                | Yes                | Yes                     | Yes                         | No                                                         | Yes                       | Yes                    | Yes                   | Valuable                      | 9/10  |
| Wakeam et al., 2014                                                               | Can't Tell        | Yes                | Yes                | Yes                     | Yes                         | Yes                                                        | Can't Tell                | No                     | Yes                   | Not Valuable                  | 6/10  |

## References

1. Damschroder LJ, Aron DC, Keith RE, et al. Fostering implementation of health services research findings into practice: a consolidated framework for advancing implementation science. *Implement Sci* 2009;4:50.
2. D'Aunno T, Broffman L, Sparer M, et al. Factors That Distinguish High-Performing Accountable Care Organizations in the Medicare Shared Savings Program. *Health Serv Res* 2016;53:120-37.
3. Mabuchi S, Sesan T, Bennett SC. Pathways to high and low performance: Factors differentiating primary care facilities under performance-based financing in Nigeria. *Health Policy and Planning* 2018;33:41-58.
4. Mannion R, Davies HTO, Marshall MN. Cultural characteristics of "high" and "low" performing hospitals. *J Health Organ Manag* 2005;19:431-39.
5. Ravaghi H, Mannion R, Sajadi HS. Organizational Failure in an NHS Hospital Trust: A Qualitative Study. *Health Care Manag (Frederick)* 2015;34:367-75.
6. Brewster AL, Cherlin EJ, Ndumele CD, et al. What Works in Readmissions Reduction: How Hospitals Improve Performance. *Medical Care* 2016;54:600-7.
7. Chang AM, Cohen DJ, Lin A, et al. Hospital Strategies for Reducing Emergency Department Crowding: A Mixed-Methods Study. *Ann Emerg Med* 2017;25:25.
8. Engle RL, Tyler DA, Gormley KE, et al. Identifying barriers to culture change: A qualitative analysis of the obstacles to delivering resident-centered care. *Psychol Serv* 2017;14:316-26.
9. Fetene N, Linnander E, Fekadu B, et al. The Ethiopian health extension program and variation in health systems performance: What matters? *PLoS ONE* 2016;11
10. Forbes-Thompson S, Leiker T, Bleich MR. High-performing and low-performing nursing homes: a view from complexity science. *Health Care Manage Rev* 2007;32:341-51.
11. Hockey PM, Bates DW. Physicians' identification of factors associated with quality in high- and low-performing hospitals. *Jt Comm J Qual Patient Saf* 2010;36:217-23.
12. Hogg W, Baskerville N, Nykiforuk C, et al. Improved preventive care in family practices with outreach facilitation: understanding success and failure. *J Health Serv Res Policy* 2002;7:195-201.
13. Hysong SJ, Best RG, Pugh JA. Clinical practice guideline implementation strategy patterns in Veterans Affairs primary care clinics. *Health Serv Res* 2007;42:84-103.
14. Miller-Day M, Applequist J, Zabokrtsky K, et al. A tale of four practices: A comparative analysis of high and low performing patient-centered medical homes. *J Health Organ Manag* 2017;31:630-46.
15. Scott-Cawiezell J, Main DS, Vojir CP, et al. Linking nursing home working conditions to organizational performance. *Health Care Manage Rev* 2005;30:372-80.
16. Shin MH, Sullivan JL, Rosen AK, et al. Examining the validity of AHRQ's patient safety indicators (PSIs): is variation in PSI composite score related to hospital organizational factors? *Med Care Res Rev* 2014;71:599-618.
17. Young GJ, Charms MP, Daley J, et al. Best practices for managing surgical services: the role of coordination. *Health Care Manage Rev* 1997;22:72-81.
18. Bickell NA, Moss AD, Castaldi M, et al. Organizational Factors Affect Safety-Net Hospitals' Breast Cancer Treatment Rates. *Health Serv Res* 2016;56:2137-55.
19. Caris MG, Kamphuis PGA, Dekker M, et al. Patient Safety Culture and the Ability to Improve: A Proof of Concept Study on Hand Hygiene. *Infect Control Hosp Epidemiol* 2017;38:1277-83.
20. Chuang E, Cabrera C, Mak S, et al. Primary care team- and clinic level factors affecting HPV vaccine uptake. *Vaccine* 2017;35:4540-47.

21. Curry LA, Spatz E, Cherlin E, et al. What distinguishes top-performing hospitals in acute myocardial infarction mortality rates? *Ann Intern Med* 2011;154:384-90.
22. Landman AB, Spatz ES, Cherlin EJ, et al. Hospital collaboration with emergency medical services in the care of patients with acute myocardial infarction: Perspectives from key hospital staff. *Ann Emerg Med* 2013;61:185-95.
23. Ellerbe LS, Manfredi L, Gupta S, et al. VA residential substance use disorder treatment program providers' perceptions of facilitators and barriers to performance on pre-admission processes. *Addict Sci Clin Pract* 2017;12:10.
24. Gabbay RA, Friedberg MW, Miller-Day M, et al. A positive deviance approach to understanding key features to improving diabetes care in the medical home. *Ann Fam Med* 2013;11:S99-S107.
25. Gagliardi AR, Nathens AB. Exploring the characteristics of high-performing hospitals that influence trauma triage and transfer. *J Trauma Acute Care Surg* 2015;78:300-5.
26. Hafner JM, Williams SC, Morton DJ, et al. From bad to better: A qualitative assessment of low-performing hospitals that improved their smoking cessation counseling performance. *J Clin Outcomes Manag* 2008;15:329-37.
27. Kirsh S, Hein M, Pogach L, et al. Improving outpatient diabetes care. *Am J Med Qual* 2012;27:233-40.
28. McAlearney AS, Hefner JL, Robbins J, et al. Preventing Central Line-Associated Bloodstream Infections: A Qualitative Study of Management Practices. *Infect Control Hosp Epidemiol* 2015;36:557-63.
29. McAlearney AS, Hefner J, Robbins J, et al. Toward a high-performance management system in health care, part 4: Using high-performance work practices to prevent central line-associated blood stream infections-a comparative case study. *Health Care Manage Rev* 2016;41:233-43.
30. McAlearney AS, Hefner JL. Getting to Zero: Goal Commitment to Reduce Blood Stream Infections. *Med Care Res Rev* 2016;73:458-77.
31. Newby KV, Parsons J, Brooks J, et al. Identifying strategies to increase influenza vaccination in GP practices: a positive deviance approach. *Fam Pract* 2016;33:318-23.
32. Ralston SL, Atwood EC, Garber MD, et al. What Works to Reduce Unnecessary Care for Bronchiolitis? A Qualitative Analysis of a National Collaborative. *Acad Pediatr* 2017;17:198-204.
33. Rose AJ, Petrakis BA, Callahan P, et al. Organizational characteristics of high- and low-performing anticoagulation clinics in the Veterans Health Administration. *Health Serv Res* 2012;47:1541-60.
34. Wakeam E, Hyder JA, Ashley SW, et al. Barriers and Strategies for Effective Patient Rescue: A Qualitative Study of Outliers. *Jt Comm J Qual Patient Saf* 2014;40:503-6.
